# Supplementary material
Source: MDPI journal article supplement (https://www.mdpi.com/2075-163X/13/8/1006)
Supplement: s1 [file s1 › minerals-2489148-supplementary.pdf]

# Supplementary Information: The Solid Solution between NaClO<sub>3</sub> and NaBrO<sub>3</sub> Revisited

Preferential orientation effect. Grinding by using a mortar and pestle does not change the theta positions of the X-ray diffraction peaks but has a great impact on the relative intensities of the diffraction peaks.

50% physical mixture Ground with M&P (black), just mixed (Blue)

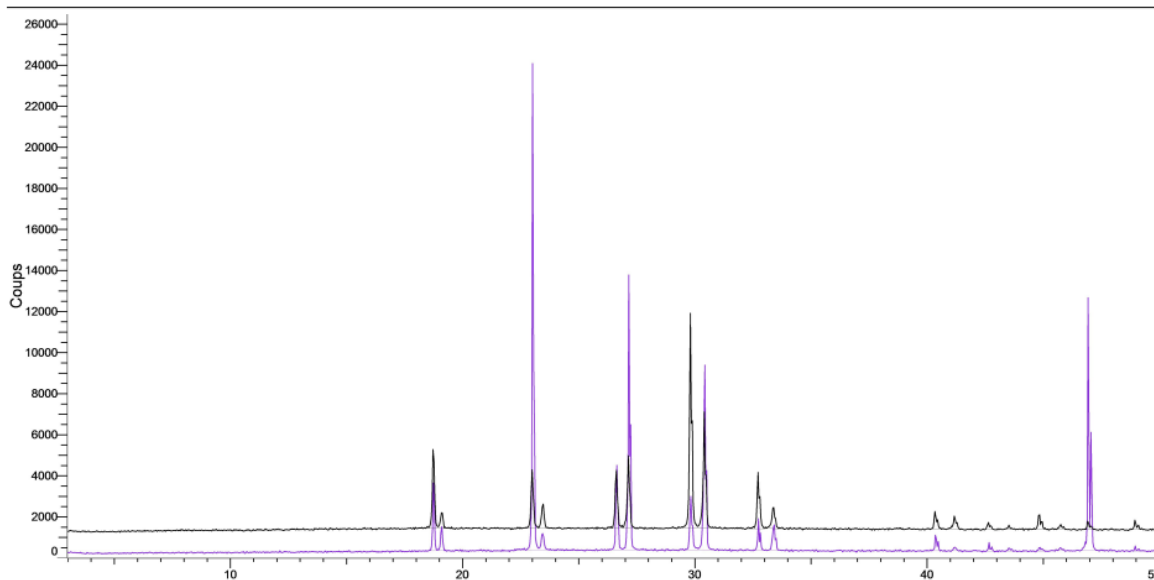

**Figure S1.** XRPD of ground NaClO<sub>3</sub>/NaBrO<sub>3</sub> physical mixture (black) and XRPD of unground NaClO<sub>3</sub>/NaBrO<sub>3</sub> physical mixture (blue);.

**Table 1.** Refined average parameter versus composition of the solid solution obtained by Spray-Drying with protocol 1.

| % NaBrO <sub>3</sub> | a (Å)  |
|----------------------|--------|
| 0                    | 6,5707 |
| 5                    | 6,5773 |
| 10                   | 6,5837 |
| 15                   | 6,5884 |
| 17,5                 | 6,5926 |
| 20                   | 6,5962 |
| 25                   | 6,6019 |
| 30                   | 6,6064 |
| 35                   | 6,615  |
| 40                   | 6,6147 |
| 50                   | 6,6297 |
| 60                   | 6,6374 |
| 70                   | 6,6503 |
| 80                   | 6,6725 |
| 90                   | 6,685  |
| 100                  | 6,6994 |
